# Supplementary material for: Marker-Assisted Pyramiding of Genes for Multilocular Ovaries, Self-Compatibility, and Clubroot Resistance in Chinese Cabbage (Brassica rapa L. ssp. pekinensis)
Source: MDPI journal article supplement (doi:10.3390/horticulturae8020139), 2022-02-06
Supplement: s1 [file s1]

Table S2 Self-compatibility primers designed based on the sequences of the *SLG*, *SRK*, and *SP11* genes

| Primer     | Sequence(5'–3')                     | Length(bp) | Source                           | S haplotype | Species                               |
|------------|-------------------------------------|------------|----------------------------------|-------------|---------------------------------------|
| PS5        | ATGAAAGGCGTAAGAAAAACCTA             | 23         | <i>SLG-8</i>                     | Class I     | <i>B. rapa</i>                        |
| PS15       | CCGTGTTTTATTTAAGAGAAAGAGCT          | 27         | <i>SLG-6</i>                     | Class I     | <i>B. oleracea</i>                    |
| PK1        | CTGCTGATCATGTTCTGCCTCTGG            | 24         | Second exon of <i>SRK</i> gene   | Class I     | <i>B. oleracea</i>                    |
| PK4        | CAATCCCAAAATCCGAGATCT               | 21         | Fifth exon of <i>SRK</i> gene    | Class I     | <i>B. oleracea</i>                    |
| PS3        | ATGAAAGGGGTACAGAACAT                | 20         | <i>SLG-2A</i>                    | Class II    | <i>B. oleracea</i>                    |
| PS21       | CTCAAGTCCCACTGCTGCGG                | 20         | <i>SLG-2A</i>                    | Class II    | <i>B. oleracea</i>                    |
| Sal-SLGI   | <sup>f</sup> ACTTCGTGATGCGAGACTCC   | 20         | <i>SLGI</i>                      | Class II    | <i>B. rapa</i>                        |
|            | <sup>r</sup> CCGCGTCTTCCTCATACACC   | 20         | <i>SLGI</i>                      | Class II    | <i>B. rapa</i>                        |
| Sal-SRKI   | <sup>f</sup> GATTATCTCGTGTCTGAATG   | 20         | Second intron of <i>SRK</i> gene | Class II    | <i>B. rapa</i> and <i>B. oleracea</i> |
|            | <sup>r</sup> GGTAATGTCGAATCTCTCCT   | 20         | Fifth exon of <i>SRK</i> gene    | Class II    | <i>B. rapa</i> and <i>B. oleracea</i> |
| Sal-SLGII  | <sup>f</sup> GGGATTGCCTGAGTTTGTTC   | 20         | <i>SLGII</i>                     | Class II    | <i>B. rapa</i> and <i>B. oleracea</i> |
|            | <sup>r</sup> TGTCGCAATAAGCATAAGCC   | 20         | <i>SLGII</i>                     | Class II    | <i>B. rapa</i> and <i>B. oleracea</i> |
| Sal-SRKII  | <sup>f</sup> TACGTCAGATTGAATGCTGCTG | 22         | First intron of <i>SRK</i> gene  | Class II    | <i>B. rapa</i> and <i>B. oleracea</i> |
|            | <sup>r</sup> GTAACACCACCTCGTTCATTAG | 22         | Second exon of <i>SRK</i> gene   | Class II    | <i>B. rapa</i> and <i>B. oleracea</i> |
| Sal-SP11II | <sup>f</sup> TTGCATAGAGTAACCGTCTC   | 20         | <i>SP11</i> gene                 | Class II    | <i>B. rapa</i> and <i>B. oleracea</i> |
|            | <sup>r</sup> CCGTCGTATATTGCATAGAGTA | 22         | <i>SP11</i> gene                 | Class II    | <i>B. rapa</i> and <i>B. oleracea</i> |

<sup>f</sup>Forward primer sequence<sup>r</sup>Reverse primer sequence
