# Supplementary material for: Marker-Assisted Pyramiding of Genes for Multilocular Ovaries, Self-Compatibility, and Clubroot Resistance in Chinese Cabbage (Brassica rapa L. ssp. pekinensis)
Source: MDPI journal article supplement (doi:10.3390/horticulturae8020139), 2022-02-06
Supplement: s1 [file s1]

**Table S3.** Background selection marker distribution on ten chromosomes of *Brassica rapa*.

| Linkage group | Number of SSR markers | Number of polymorphism SSR markers | Physical distance (Mb) | Average interval (Mb) |
|---------------|-----------------------|------------------------------------|------------------------|-----------------------|
| A1            | 38                    | 10                                 | 26.00                  | 2.60                  |
| A2            | 19                    | 9                                  | 25.20                  | 2.80                  |
| A3            | 36                    | 11                                 | 31.03                  | 2.82                  |
| A4            | 26                    | 12                                 | 18.96                  | 1.58                  |
| A5            | 37                    | 11                                 | 25.06                  | 2.28                  |
| A6            | 39                    | 11                                 | 25.10                  | 2.28                  |
| A7            | 36                    | 12                                 | 24.82                  | 2.07                  |
| A8            | 30                    | 10                                 | 18.84                  | 1.88                  |
| A9            | 37                    | 13                                 | 38.50                  | 2.96                  |
| A10           | 21                    | 12                                 | 15.76                  | 1.31                  |
| Total         | 319                   | 111                                | 249.27                 | 2.25                  |
