# Supplementary material for: Marker-Assisted Pyramiding of Genes for Multilocular Ovaries, Self-Compatibility, and Clubroot Resistance in Chinese Cabbage (Brassica rapa L. ssp. pekinensis)
Source: MDPI journal article supplement (doi:10.3390/horticulturae8020139), 2022-02-06
Supplement: s1 [file s1]

Table S1 Molecular markers designed for foreground selection of three targeted loci

| Character          | Primer    | Marker type  | Sequences (5'—3')                       |
|--------------------|-----------|--------------|-----------------------------------------|
| Multilocular*      | Teo-1     | SSR          | <sup>f</sup> ACACGAGATAGATGTCCGCG       |
|                    |           |              | <sup>r</sup> GCCAATGCCAATGTTCATGC       |
|                    | Teo-2     | SSR          | <sup>f</sup> TCATCTGCCAAATCAATCACCA     |
|                    |           |              | <sup>r</sup> GCCAATGCCAATGTTCATGC       |
|                    | sau_um190 | Based on PCR | <sup>f</sup> CTTCTCGAAGTCGTCTCCCTTA     |
|                    |           |              | <sup>r</sup> GCTGATACCGGAGATCAGAATG     |
|                    | cnu_246a  | Based on PCR | <sup>f</sup> AAAGCCATCCATCCATCAAGC      |
|                    |           |              | <sup>r</sup> GATGCAACATTTGACTGTGTTAGAGC |
| self-compatibility | SCF-1     | SSR          | <sup>f</sup> CACCGTTTAAGTCTTGCCCA       |
|                    |           |              | <sup>r</sup> TGTGCCGATTCTTCAGTTGC       |
|                    | SCF-2     | SSR          | <sup>f</sup> TTGTAACGAGGATGGCGGAT       |
|                    |           |              | <sup>r</sup> TGGCGAATGGAAATACAGCA       |
|                    | SCF-3     | SSR          | <sup>f</sup> TCGCTGGCTAGAAATATCCGT      |
|                    |           |              | <sup>r</sup> CTGGCGTTCTCAATCCCTTG       |
|                    | SCF-4     | SSR          | <sup>f</sup> TTCCCAATTTGTTCCAGGCG       |
|                    |           |              | <sup>r</sup> TGAGCCAGGACCAAGACTAC       |
|                    | SCF-5     | SSR          | <sup>f</sup> CCTGTGATCCCCAGACTTGT       |
|                    |           |              | <sup>r</sup> AGCAAACGTCATCTCGGA         |
|                    | SCF-6     | SSR          | <sup>f</sup> TGCTGTTGAATTAGAGGAGCC      |
|                    |           |              | <sup>r</sup> TTTGCTTGCTGTAGGGTGAG       |
|                    | SCF-7     | SSR          | <sup>f</sup> AGCATATGATCTCTGCTCTGC      |
|                    |           |              | <sup>r</sup> TGAAGCACCCGTTTGTGTGTT      |
|                    | SC-8      | SSR          | <sup>f</sup> ACCACCCAGCTGCTAAGAAT       |
|                    |           |              | <sup>r</sup> GGCCCAGATGCAGGAATAGT       |
|                    | SC-9      | SSR          | <sup>f</sup> GTCTAAACAGCACACACCG        |
|                    |           |              | <sup>r</sup> CGCGGTAAATGCATAACAAGC      |
|                    | SC-10     | SSR          | <sup>f</sup> CTGAATGGAAGAGCTCGCAG       |
|                    |           |              | <sup>r</sup> ACATTGTCCACTGTGCCAAC       |
|                    | SC-11     | SSR          | <sup>f</sup> AGTTTCCAGAATCATTACGCGA     |
|                    |           |              | <sup>r</sup> TCGTCTAATTGGGCAATGCG       |
|                    | SC-12     | SSR          | <sup>f</sup> TGGAGAGGAAAGATGTTGAAGAC    |
|                    |           |              | <sup>r</sup> TTGAAGGAAAGAGGAAGCGC       |

|               |            |              |                                       |
|---------------|------------|--------------|---------------------------------------|
|               | PK1        | Based on PCR | <sup>f</sup> CTGCTGATCATGTTCTGCCTCTGG |
|               | PK4        | Based on PCR | <sup>f</sup> CAATCCCCAAAATCCGAGATCT   |
|               | Sal-SLGI   | Based on PCR | <sup>f</sup> ACTTCGTGATGCGAGACTCC     |
|               |            |              | <sup>r</sup> CCGCGTCTTCCTCATAACACC    |
| <i>CRb</i> ** | cnu_ssr413 | SSR          | <sup>f</sup> ATTGTAAGTCGGAATTAAA      |
|               |            |              | <sup>r</sup> GATGATTAGTTTTGGTGTCTTTG  |
|               | TCR37      | InDel        | <sup>f</sup> GGAATTTGAGGAGGGACTC      |
|               |            |              | <sup>r</sup> CAAAGAAAGAGCTCCAATCACA   |
|               | TCR74      | SSR          | <sup>f</sup> ATGGATGATGGATGGATAGAGTG  |
|               |            |              | <sup>r</sup> TTGAACCATAGGAGGGATAGTTG  |
|               | TCR79      | SSR          | <sup>f</sup> TGACGTTCAATCAAAGCCTGA    |
|               |            |              | <sup>r</sup> TTTAGCAATCAAATGCAAATTCAA |
|               | TCR01      | SSR          | <sup>f</sup> GGCACGTGAGAAAAACGTAT     |
|               |            |              | <sup>r</sup> GAGACGAGTTGACGAAGTAA     |

\*markers linked for multilocular were designed by Yadava et al. [4]

\*\* markers linked for *CRb* gene were reported by Zhang et al. [44]

<sup>f</sup>forword marker sequence

<sup>r</sup>Reverse marker sequence
