# Supplementary figures and images for: Marker-Assisted Pyramiding of Genes for Multilocular Ovaries, Self-Compatibility, and Clubroot Resistance in Chinese Cabbage (Brassica rapa L. ssp. pekinensis)
Source: MDPI journal article supplement (doi:10.3390/horticulturae8020139), 2022-02-06

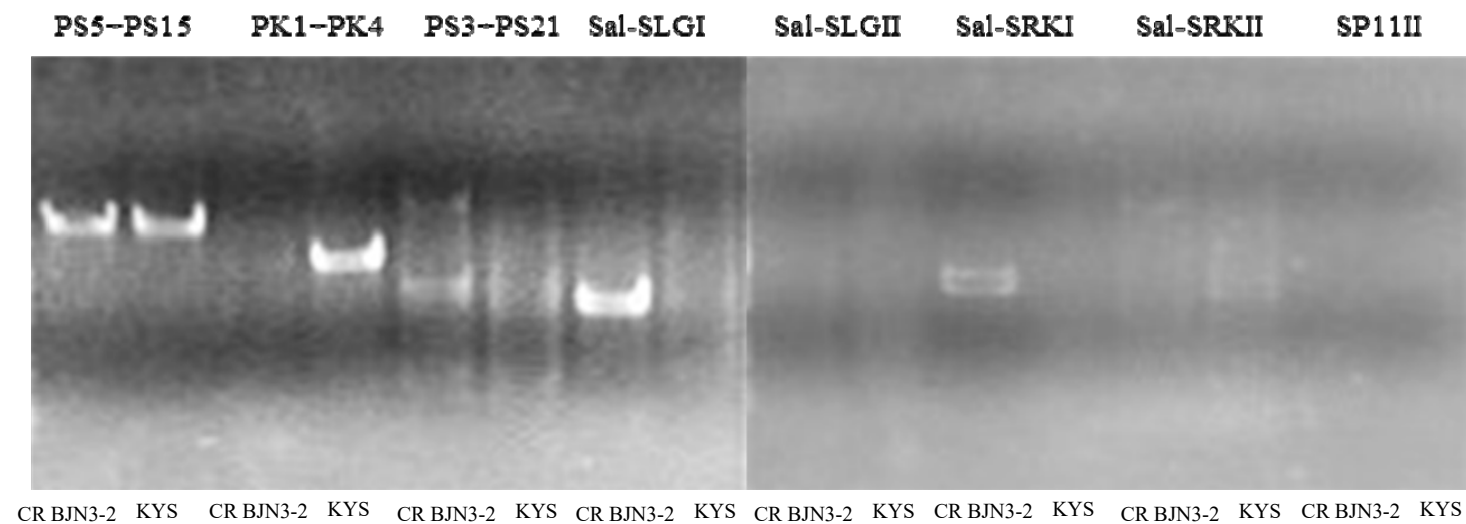

Figure S1 Screening results of polymorphic markers

Supplement: s1 [file s1]
